# Supplementary material for: Shape-Shifted Red Blood Cells: A Novel Red Blood Cell Stage?
Source: MDPI journal article supplement (doi:10.3390/cells7040031), 2018-04-19
Supplement: s1 [file s1]

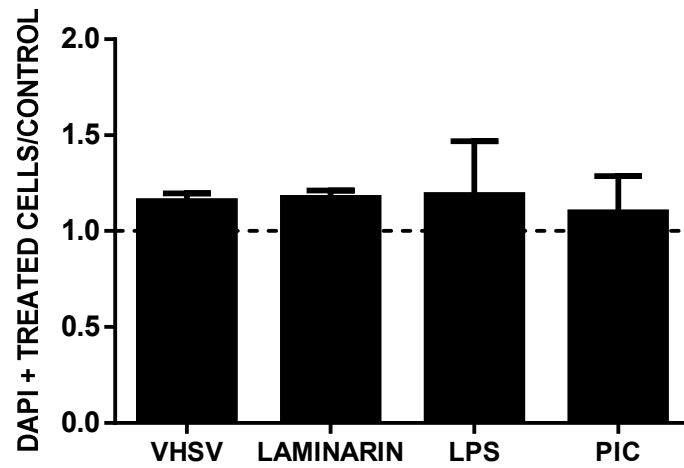

**Figure S1.** shRBC generation after RBC exposure to VHSV, laminarin, LPS, and Poly I:C. Ficoll-purified RBCs were incubated with VHSV at MOI 1, laminarin (0.5  $\mu\text{g}/\mu\text{L}$ ), LPS (1  $\mu\text{g}/\mu\text{L}$ ) and Poly I:C (30  $\mu\text{g}/\mu\text{L}$ ) for 3 days at 14 °C. Cells were stained with DAPI at a concentration of 0.3  $\mu\text{g}/\text{mL}$  for 10 min. Data are displayed as black bars showing mean  $\pm$  SD (n = 3) relative to untreated control cells (dashed line).
